# Supplementary material
Source: Springer Nature journal article supplement (https://www.springermedizin.de/resource/supplementary/13063_2013_1906_MOESM2_ESM.pdf/9621178)

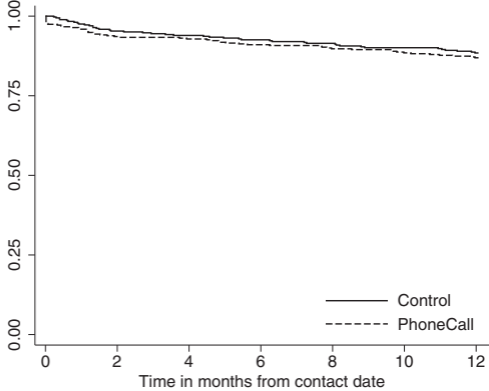

Number at risk

|            |     |     |     |     |     |     |     |
|------------|-----|-----|-----|-----|-----|-----|-----|
| Control    | 363 | 346 | 341 | 336 | 332 | 327 | 321 |
| Phone Call | 390 | 365 | 362 | 355 | 350 | 345 | 339 |

Supplement: MOESM2 [file 9621178]
